# Supplementary material for: Reaction of Amino-Terminated PAMAM Dendrimers with Carbon Dioxide in Aqueous and Methanol Solutions
Source: MDPI journal article supplement (doi:10.3390/molecules27020540), 2022-01-15
Supplement: s1 [file s1]

## SUPPLEMENTARY MATERIALS

### **Reaction of amino-terminated PAMAM dendrimers with carbon dioxide in aqueous and methanol solutions**

Beijun Cheng<sup>1,2</sup>, and Angel E. Kaifer<sup>1,\*</sup>

<sup>1</sup>Department of Chemistry, University of Miami, Coral Gables, FL 33124, USA

<sup>2</sup>Current address: School of Chemistry and Chemical Engineering, Qilu University of Technology (Shandong Academy of Sciences), Jinan, Shandong, 250353 China

\*Correspondence: akaifer@miami.edu

#### TABLE OF CONTENTS

|                                                                                        | Page(s) |
|----------------------------------------------------------------------------------------|---------|
|                                                                                        | =====   |
| Reaction of carbon dioxide with amines .....                                           | S2      |
| <sup>1</sup> H NMR spectra of dendrimers G1, G3 and G5 in D <sub>2</sub> O .....       | S2-S4   |
| Spectral evolution under CO <sub>2</sub> (g) for G3 and G5 in D <sub>2</sub> O .....   | S5-S6   |
| <sup>1</sup> H NMR spectra of dendrimers G1, G3 and G5 in CD <sub>3</sub> OD .....     | S7-S9   |
| Spectral evolution under CO <sub>2</sub> (g) for G1 and G3 in CD <sub>3</sub> OD ..... | S10-S11 |
| Video files .....                                                                      | S12     |
| Recovery of initial material in the case of dendrimer G3 .....                         | S13     |

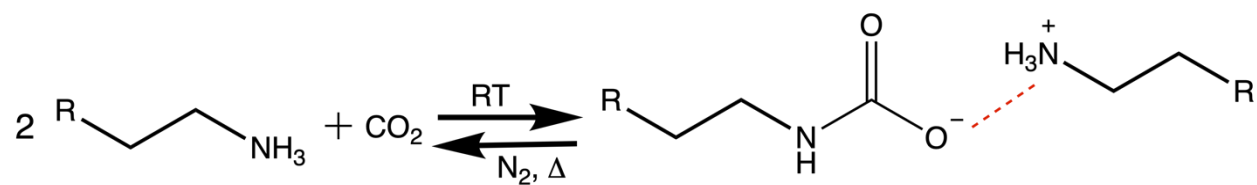

**Scheme S1.** Reaction of carbon dioxide with amines.

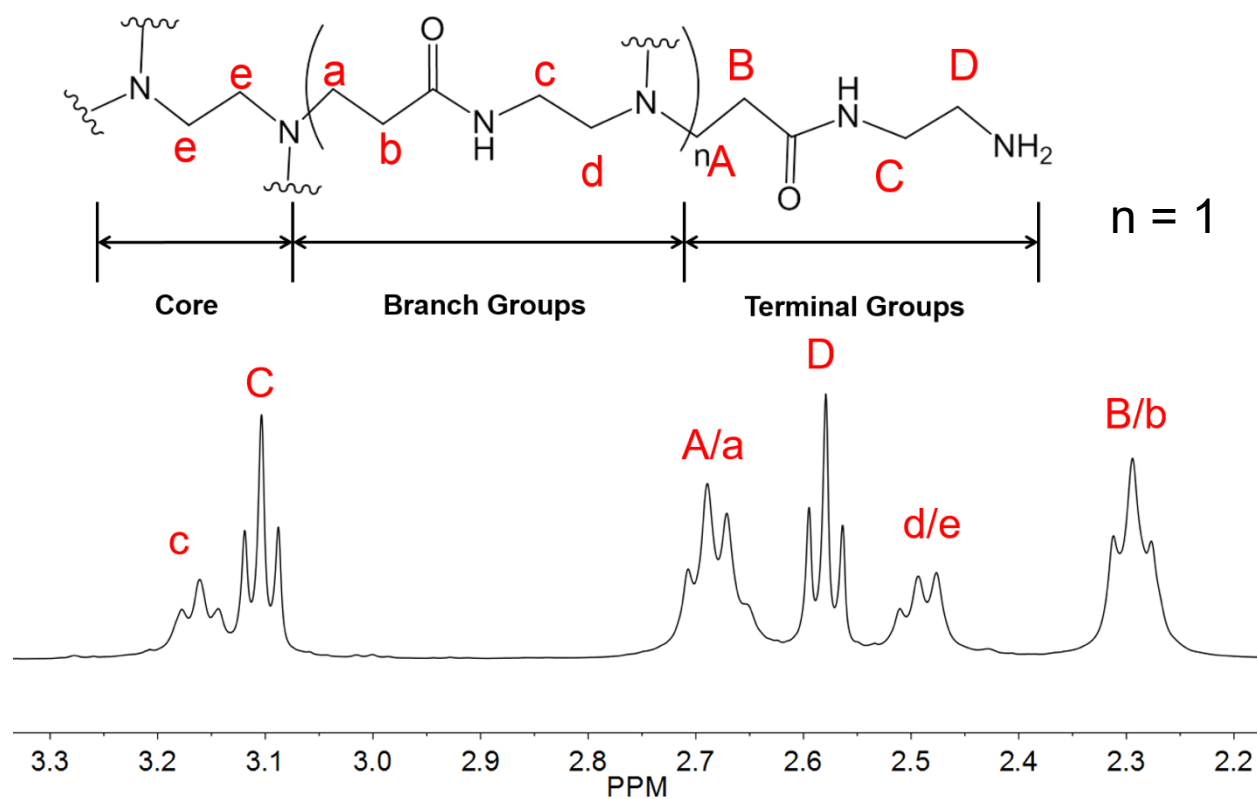

**Figure S1.** <sup>1</sup>H NMR (400 MHz, D<sub>2</sub>O) of first generation PAMAM dendrimer (G1).

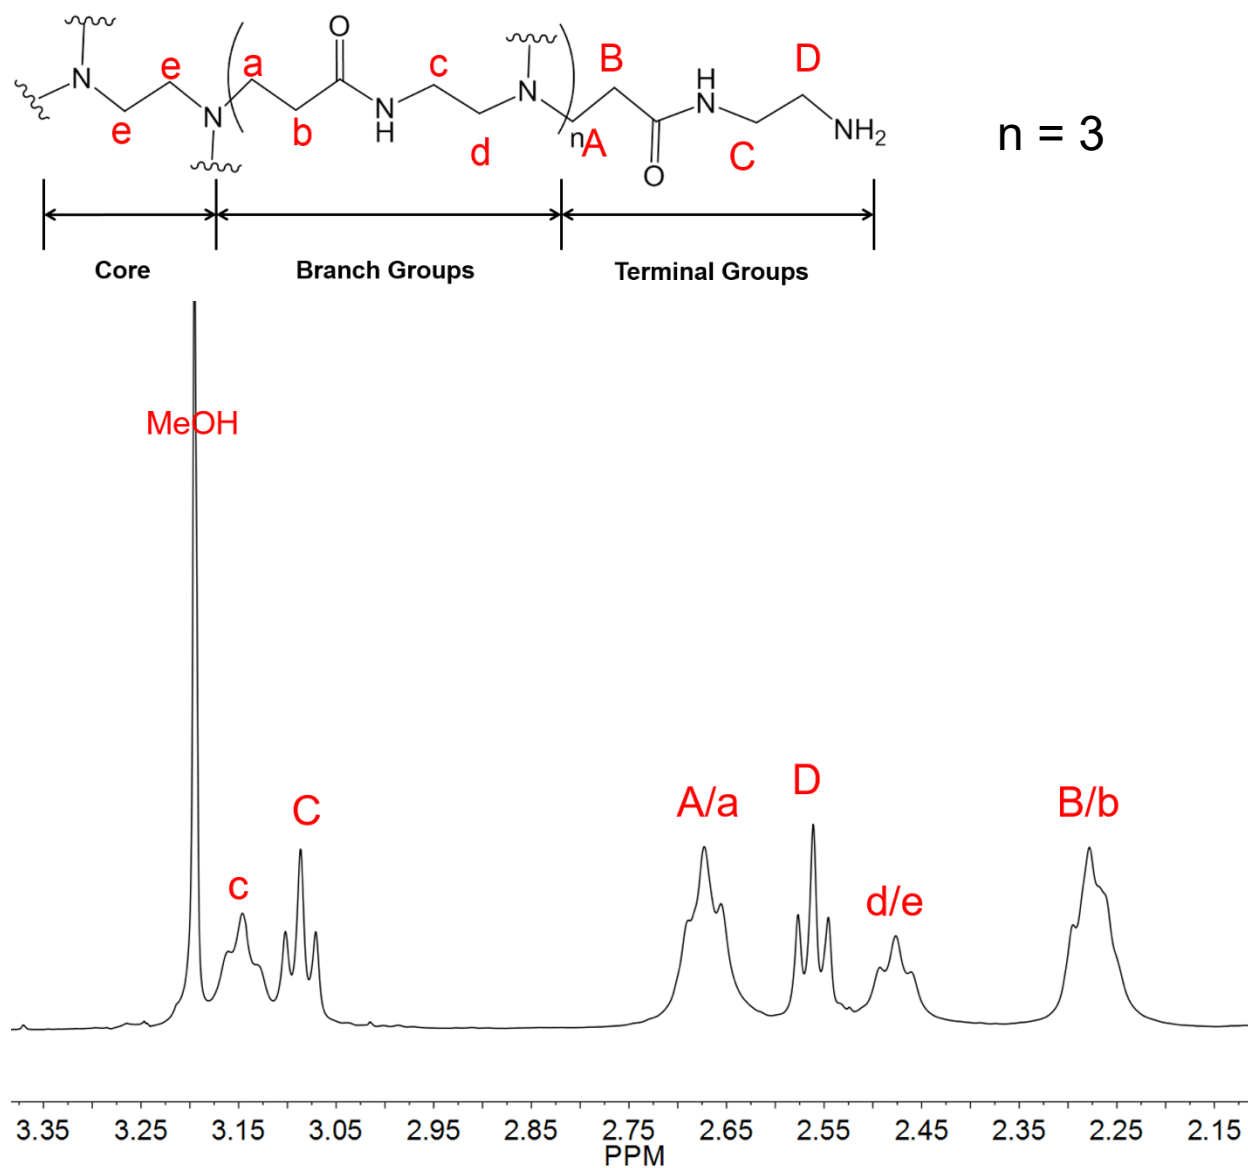

Figure S2.  $^1\text{H}$  NMR (400 MHz,  $\text{D}_2\text{O}$ ) of third generation PAMAM dendrimer (G3).

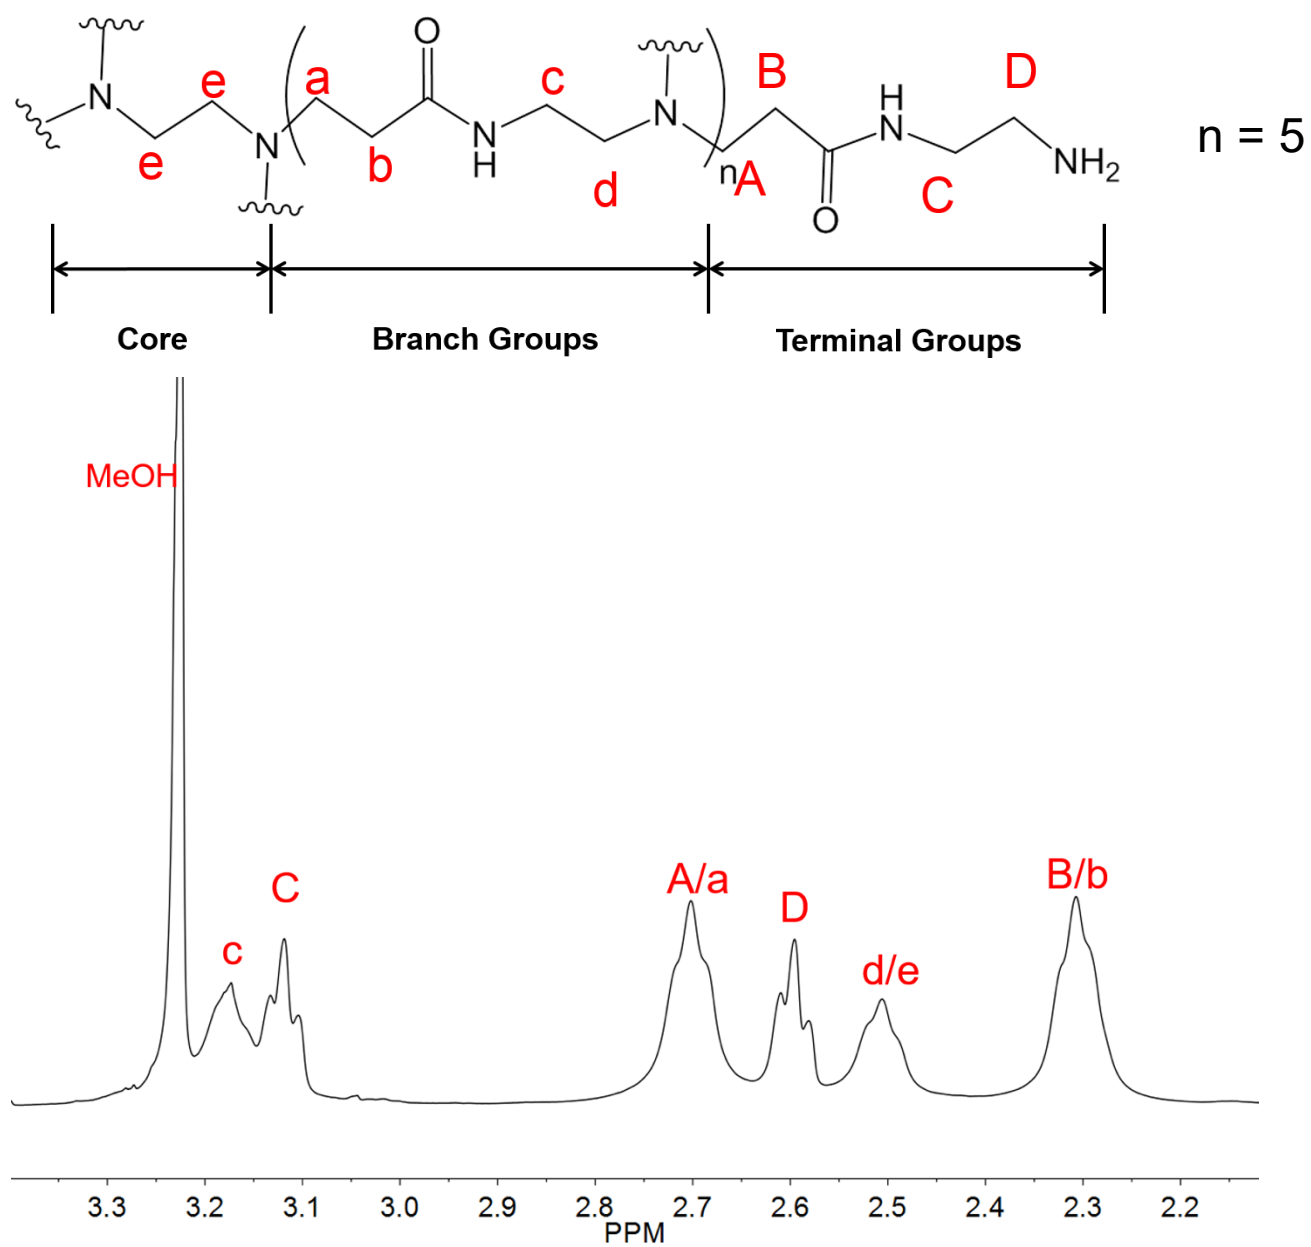

**Figure S3.**  $^1\text{H}$  NMR (400 MHz,  $\text{D}_2\text{O}$ ) of fifth generation PAMAM dendrimer (G5).

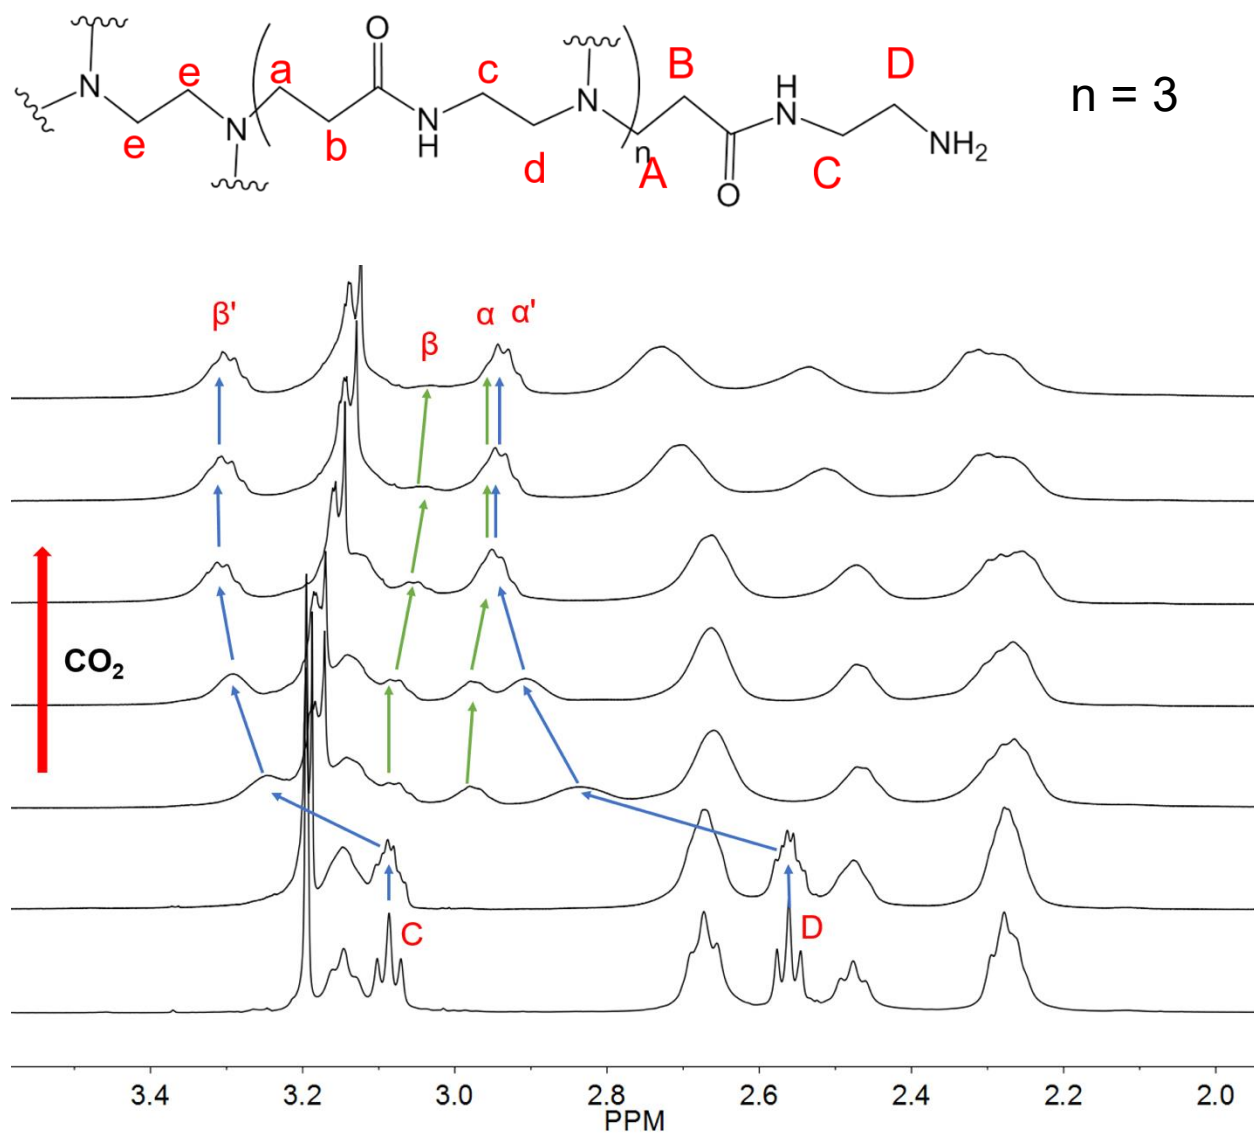

**Figure S4.**  $^1\text{H}$  NMR spectra (400 MHz,  $\text{D}_2\text{O}$ ) of G3 dendrimer (0.026 M) upon addition of  $\text{CO}_2(\text{g})$  to the solution. The terminal methylene protons of the ammonium branches are labeled  $\beta'$  and  $\alpha'$  and those of the carbamate branches are labeled  $\beta$  and  $\alpha$ .

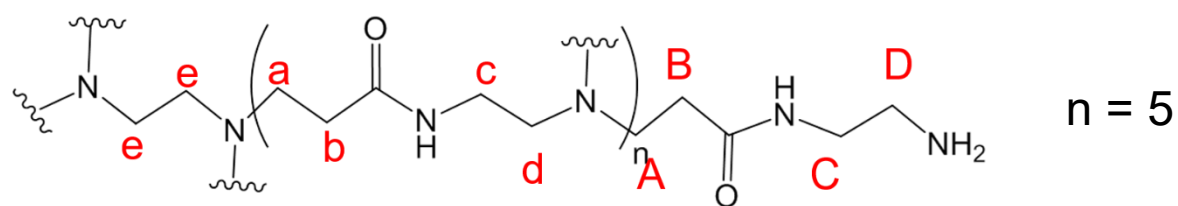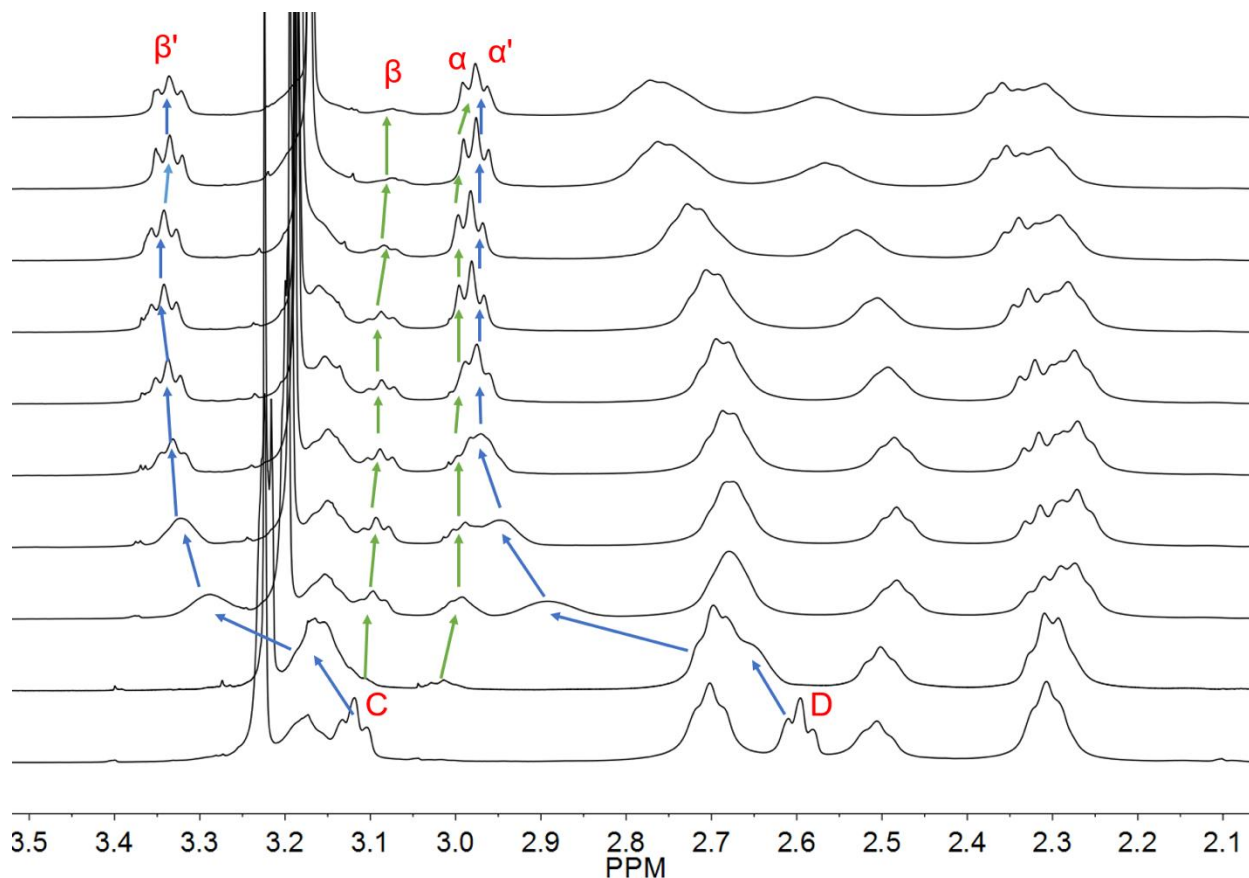

**Figure S5.**  $^1\text{H}$  NMR spectra (400 MHz,  $\text{D}_2\text{O}$ ) of G5 dendrimer (0.009 M) upon addition of  $\text{CO}_2(\text{g})$  to the solution. The terminal methylene protons of the ammonium branches are labeled  $\beta'$  and  $\alpha'$  and those of the carbamate branches are labeled  $\beta$  and  $\alpha$ .

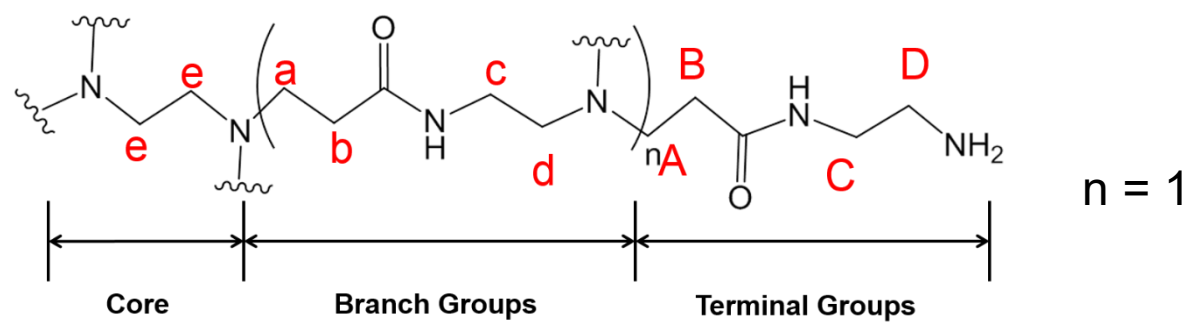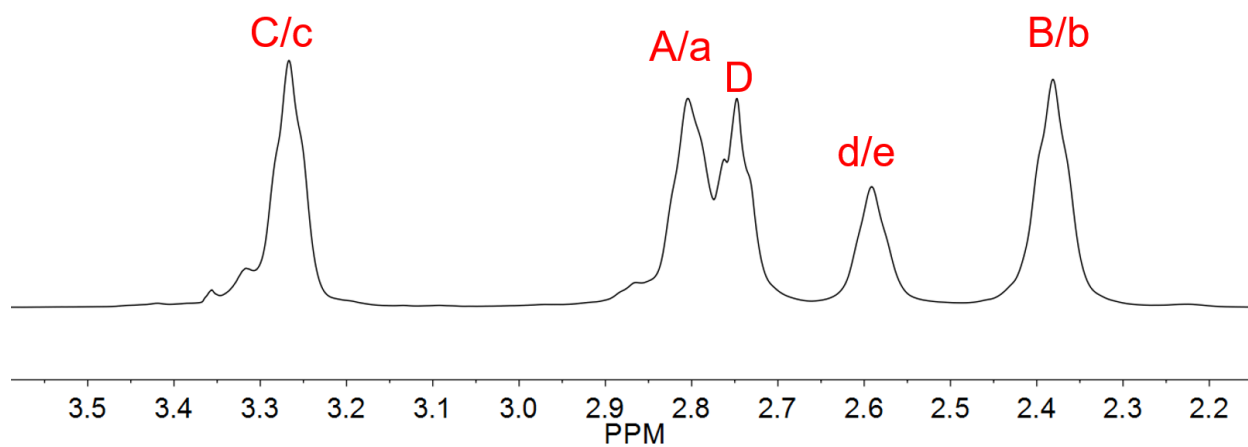

Figure S6.  $^1\text{H}$  NMR spectrum (400 MHz,  $\text{CD}_3\text{OD}$ ) of first generation dendrimer (G1)

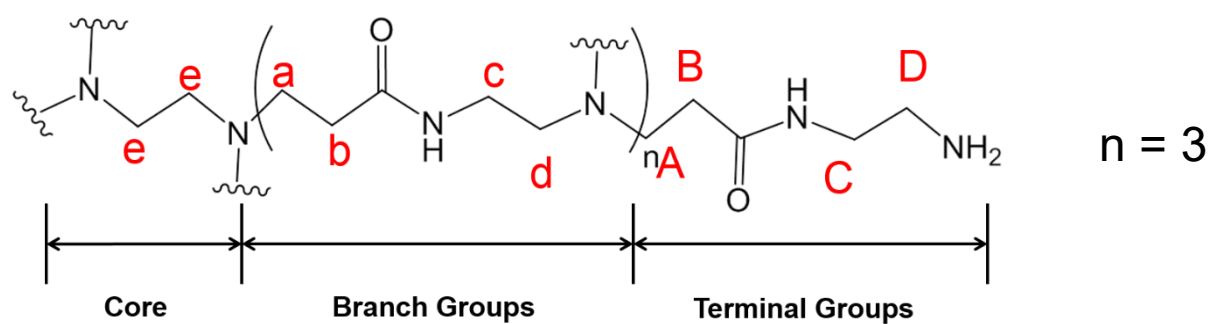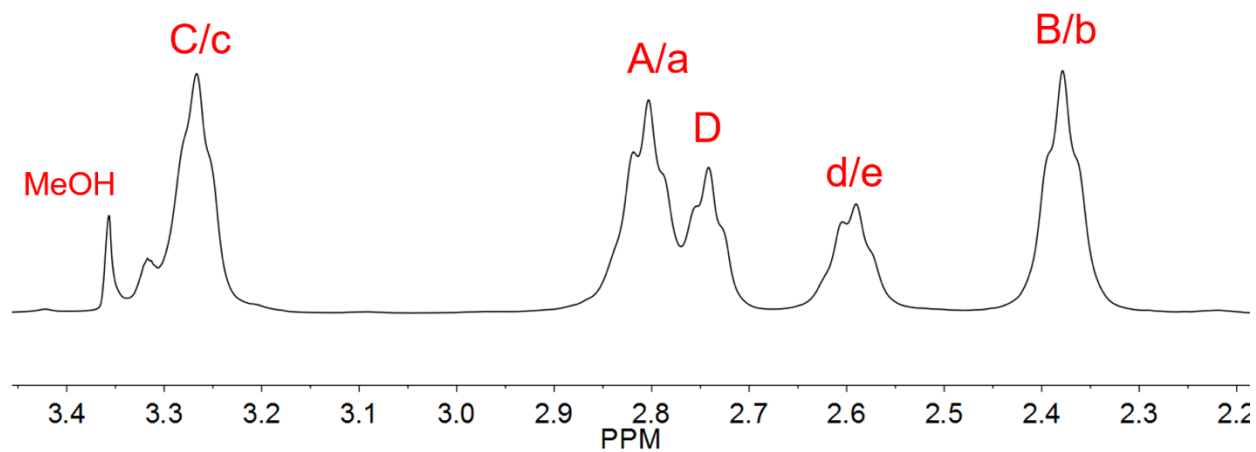

**Figure S7.**  $^1\text{H}$  NMR spectrum (400 MHz,  $\text{CD}_3\text{OD}$ ) of third generation dendrimer (G3)



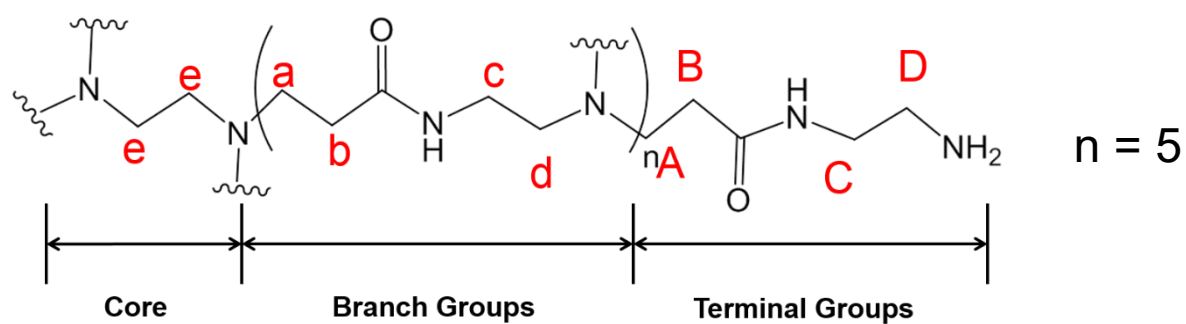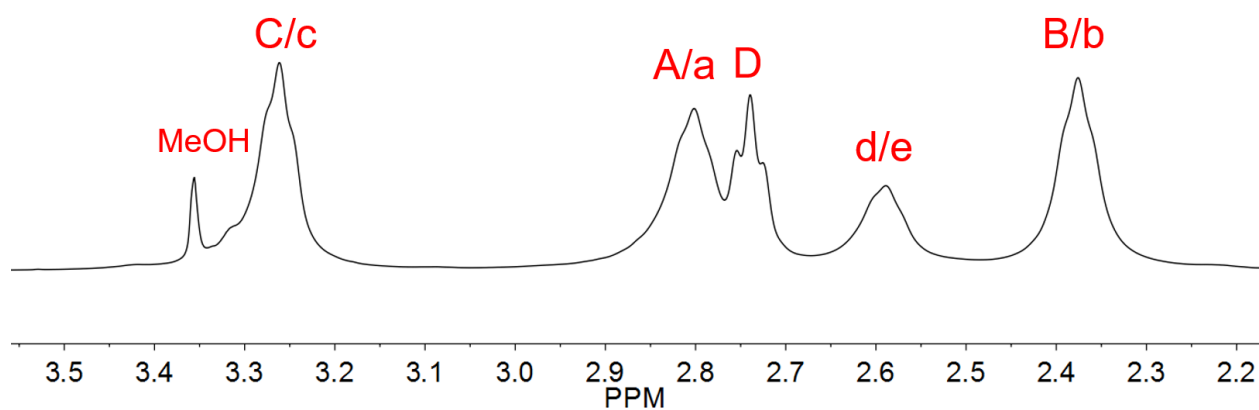

**Figure S8.**  $^1\text{H}$  NMR spectrum (400 MHz,  $\text{CD}_3\text{OD}$ ) of fifth generation dendrimer (G5)

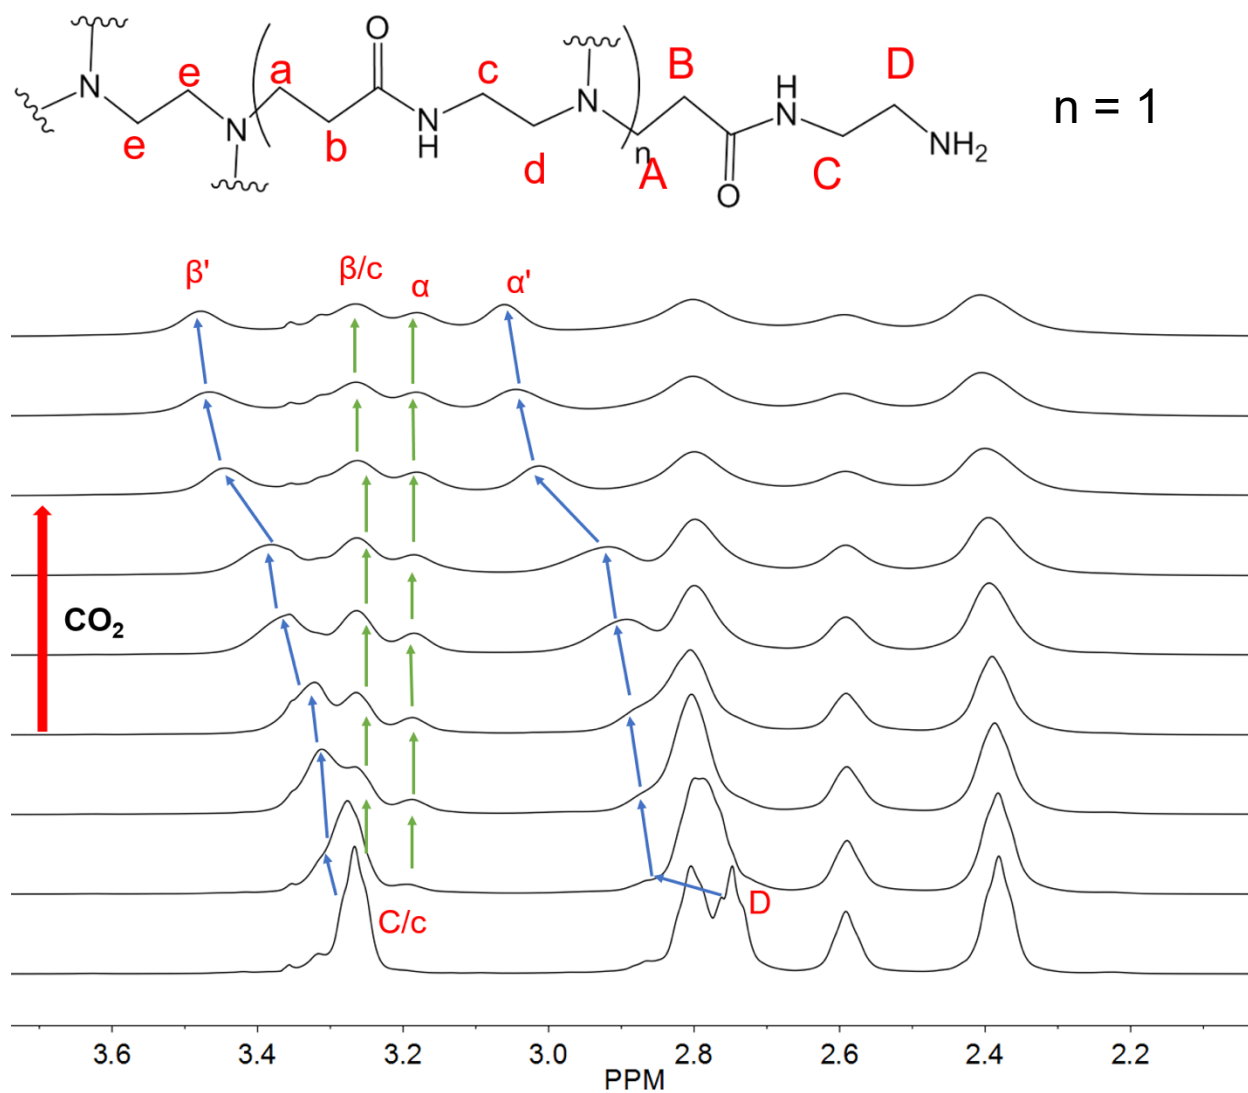

**Figure S9.**  $^1\text{H}$  NMR spectra (400 MHz,  $\text{CD}_3\text{OD}$ ) of G1 dendrimer (0.32 M) upon addition of  $\text{CO}_2(\text{g})$  to the solution. The terminal methylene protons of the ammonium branches are labeled  $\beta'$  and  $\alpha'$  and those of the carbamate branches are labeled  $\beta$  and  $\alpha$ .

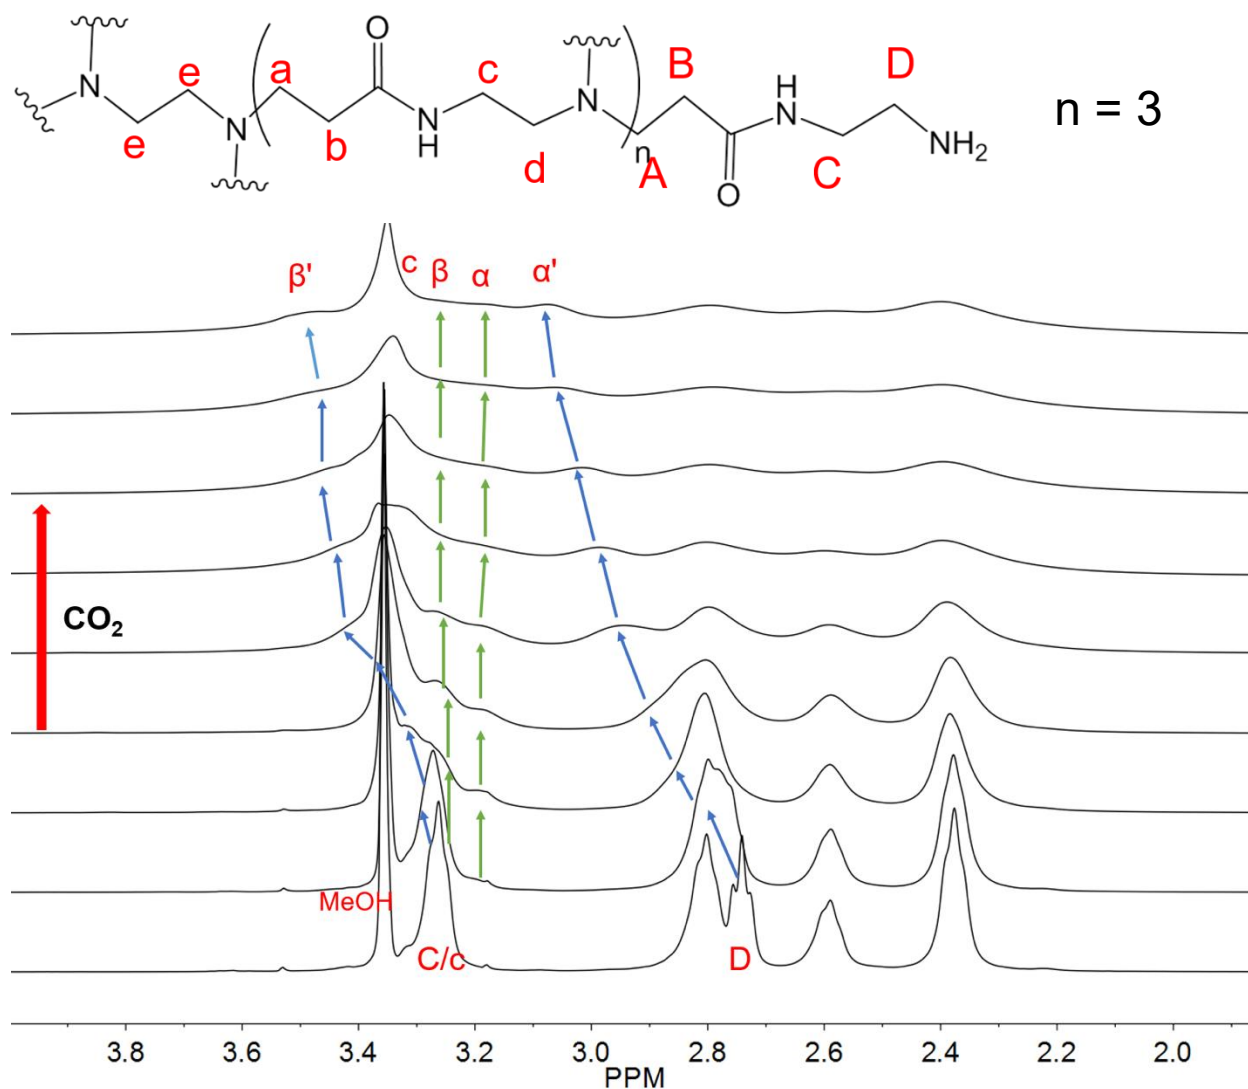

**Figure S10.**  $^1\text{H}$  NMR spectra (400 MHz,  $\text{CD}_3\text{OD}$ ) of G3 dendrimer (0.080 M) upon addition of  $\text{CO}_2(\text{g})$  to the solution. The terminal methylene protons of the ammonium branches are labeled  $\beta'$  and  $\alpha'$  and those of the carbamate branches are labeled  $\beta$

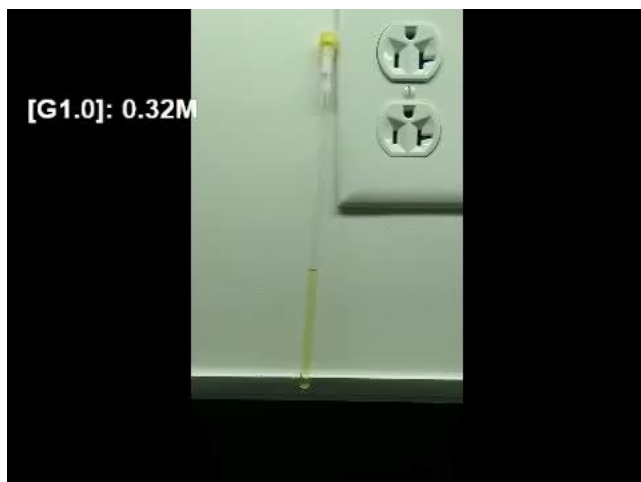

**Video S1.** Behavior of a 0.32 M methanolic solution of the G1 dendrimer after reaction with  $\text{CO}_2(\text{g})$ . (Double click on the file to play the video).

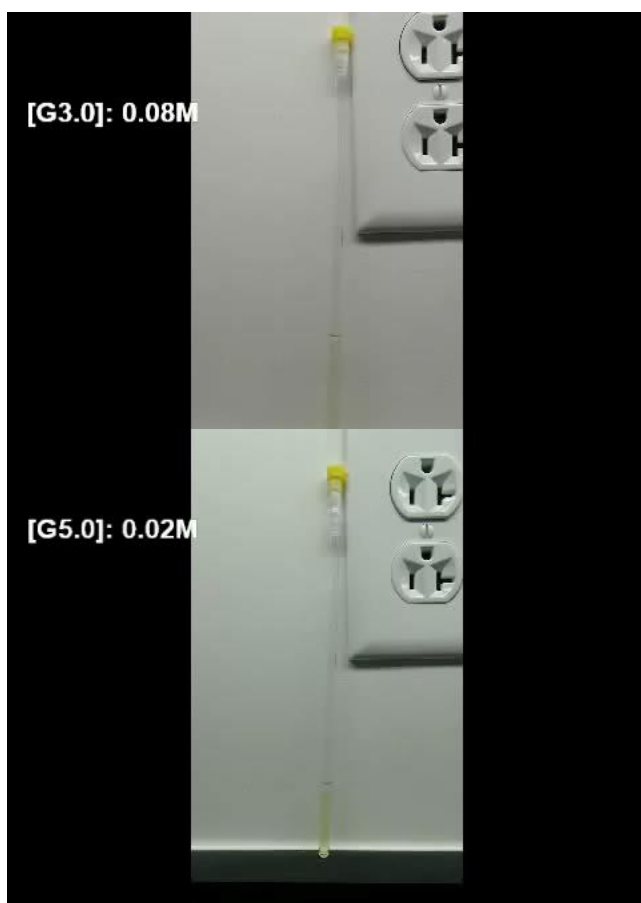

**Video S2.** Behavior of a 0.080 M methanolic solution of the G3 dendrimer after reaction with  $\text{CO}_2(\text{g})$ . (Double click on the file to play the video).

**Video S3.** Behavior of a 0.020 M methanolic solution of the G5 dendrimer after reaction with CO<sub>2</sub>(g). (Double click on the file to play the video).

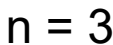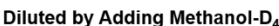

Page S14
